# Supplementary material for: Vesicular Glutamate Release from Feeder-FreehiPSC-Derived Neurons
Source: MDPI journal article supplement (doi:10.3390/ijms231810545), 2022-09-11
Supplement: s1 [file s1]

Figure S1. Array CGH analysis

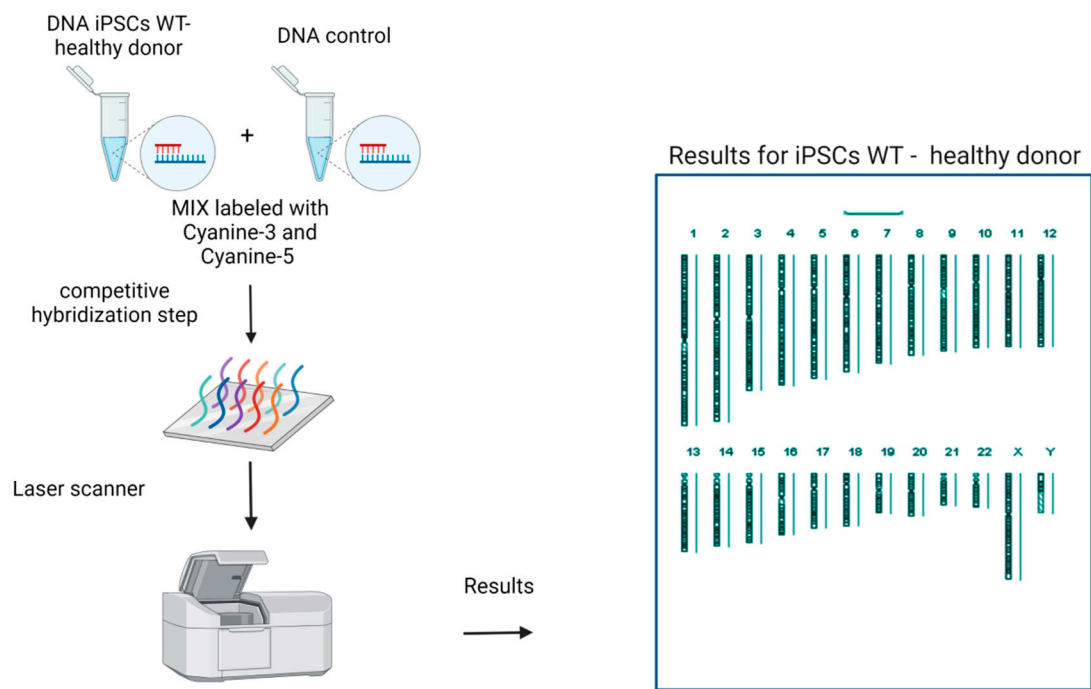

**On the left:** Schematic representation of array-CGH analysis DNA from iPSCs WT clone versus DNA control.

**On the right:** Array-CGH showed the complete absence of chromosomal rearrangements on iPSCs WT clone used.

Figure S2. Immunofluorescence for synaptic proteins from different experimental group

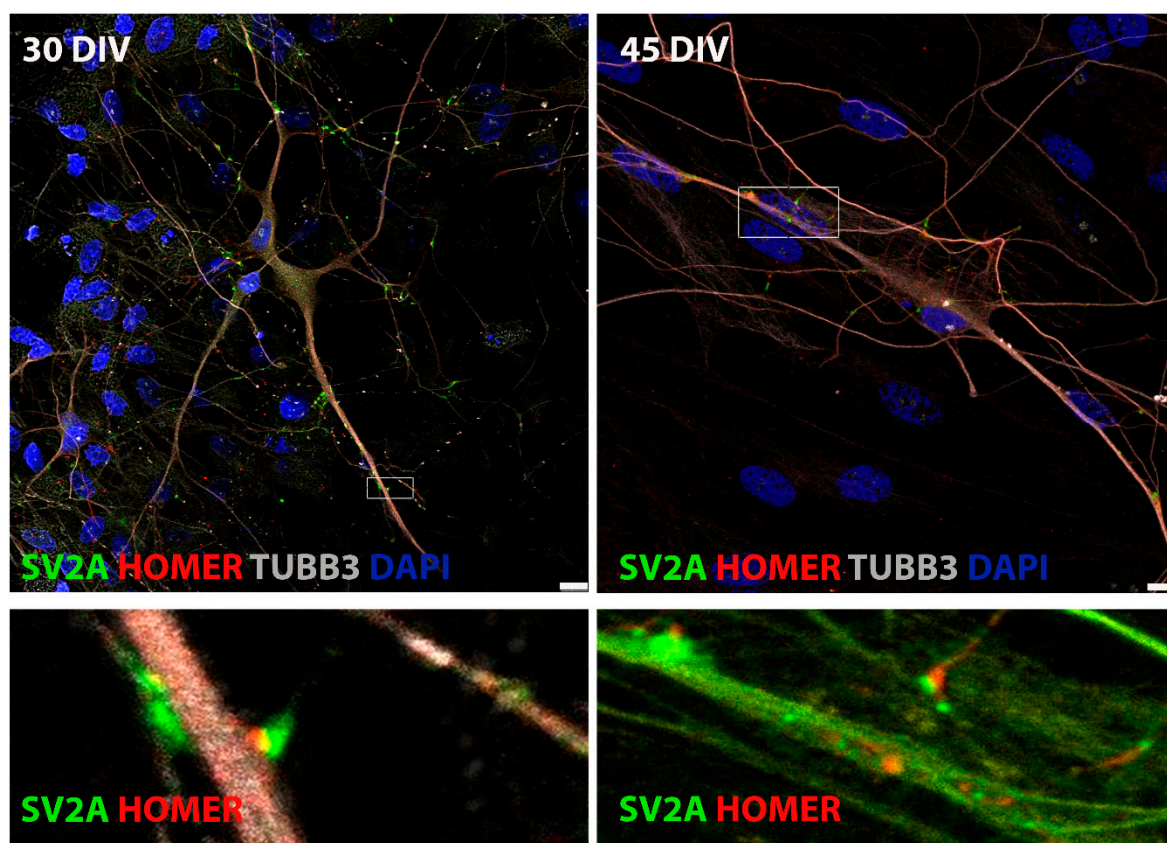

**Figure S2.** Representative images of expression of neuronal proteins in hiPSC-derived neurons, obtained from different experimental group. Synaptic proteins SV2A (green), HOMER (red) co-localized at synaptic sites at 30-45 DIV. Neuronal marker for microtubule element TUBB3 (gray). Total cells were stained with nuclear marker DAPI (blue). Scale bar 10  $\mu$ m.

**Table S1:** Primers sequences

| Gene Name     | Forward                    | Reverse                | Accession number |
|---------------|----------------------------|------------------------|------------------|
| human NANOG   | TGTCTTCTGCTGAGATGCCT       | AATAAGCAGATCCATGGAGGA  | NM_024865.3      |
| human NESTIN  | CAGAGGTGGAAGATACGGT        | AGCTCTGCCTCATCCTCATT   | NM_006617        |
| human SOX2    | ACCAGCTCGCAGACCTACAT       | CCTGCTGCGAGTAGGACAT    | NM_003106        |
| human SOX1    | TCCTGGAGTATGGACTGTCCG      | GAATGCAGGCTGAATTCGG    | NM_005986        |
| human PAX6    | GATAACATACCAAGCGTGCATCAATA | TGCGCCCATCTGTTGCT      | NM_000280        |
| human CACNA1A | AAACCCACCATCACCACCGA       | GTCCCAAGCCCACGGTTTTTC  | NM_001127222     |
| human CACNA1B | TGGAAGTACTTCGACCTGC        | CTTGAGCACCACCTGCAAAC   | NM_000718        |
| human CACNA1D | TGAACATGGTCTTCACCGGG       | TGCTGCCGATTACGATGAGG   | NM_000720        |
| human CACNA1E | CTGGCGAAGCCTTTGGGA         | TCACTACGCAGTCGAAGACG   | NM_001205293     |
| human MAP2    | TGAACAAGAGAAGGAAGCCCAA     | GAAGGTGGCAGATTAGCTGTTT | NM_002374        |
| human TUBB3   | AGCGTCTACTACAACGAGGC       | GATGTCCAAAGGCCCTGAG    | NM_006086        |
| humand PSD95  | CATCCCTCCCTTTTCCCCAA       | CTGCCTTCCACATGCCCC     | NM_001369566     |
| human SYP     | AGTGTTTCGCTTTCATGTGGC      | GGCCATCTTCACATCGGACA   | NM_003179        |
| human VAMP2   | CTGCACCTCCTCCAAACCTT       | CAGCTCCGACAACTTCTGGT   | NM_014232        |
| human VGAT    | CAGCTGCGAGGGTCATGAG        | GAACGCGATGCAAGAAGGC    | NM_080552        |
| human VGLUT2  | CCAGGAAAAGAGGGGCTAAA       | CGGTGTCTTGCTTCTTCTCC   | NM_020346        |
| human VGLUT3  | CTCCCAAGCGTTACATCAT        | ATTTCACAATGGCAACTCC    | NM_139319        |
| human CHRM3   | ATCGGCAACATCCTGGTAAT       | GTCACAGGCCAAGTTCCTA    | NM_001375978     |
| human GRIN1   | GAAGCACGAGCAGATGTTCC       | GTTGGGCTTGTCGTGAC      | NM_000832        |
| human HTR2a   | GGATTTACCTGGACGTGCTC       | TGGTCCAAACAGCAATGATT   | NM_000621        |
| human PPIA    | GGAGGCTTTGAGGTTTGCAA       | CCTGACATCTAACTGCCAGCA  | NM_021130        |
| human RPL13A  | TGAAAGCACTCGGAGAATTG       | ACAAGATAGGGCCCTCCA     | NM_012423        |
| human GAPDH   | AGCAAGAGCACAAGAGGAAGAG     | TAACTGGTTGAGCACAGGGTAC | NM_002046        |

**Table S2:** Antibodies

| REAGENT or RESOURCE | SOURCE                   | IDENTIFIER | DILUTION |        |
|---------------------|--------------------------|------------|----------|--------|
| Primary Antibodies  |                          |            | IF       | WB     |
| Map2                | Synaptic systems         | 188003     | 1:200    |        |
| Nestin              | Thermo Fisher Scientific | A24345     | 1:100    |        |
| Pax6                | Thermo Fisher Scientific | A24340     | 1:100    |        |
| SOX1                | Thermo Fisher Scientific | A24347     | 1:100    |        |
| SOX2                | Thermo Fisher Scientific | A24339     | 1:100    |        |
| OCT4                | Thermo Fisher Scientific | A24847     | 1:100    |        |
| SSEA4               | Thermo Fisher Scientific | A24866     | 1:100    |        |
| SOX2                | Thermo Fisher Scientific | A24759     | 1:100    |        |
| TRA-1-60            | Thermo Fisher Scientific | A24868     | 1:100    |        |
| Homer-1             | Synaptic systems         | 160 011    | 1:100    | 1:1000 |
| SV2A                | Synaptic systems         | 119 011    | 1:100    | 1:1000 |
| PSD95               | Synaptic systems         | 124 011    | 1:100    | 1:1000 |
| Synaptophysin 1     | Synaptic systems         | 101 101    | 1:100    | 1:1000 |
| TUBB3               | Synaptic systems         | 302 304    | 1:100    |        |
| TUBB3               | Sigma                    | T2200      |          | 1:1000 |
| V-GLUT2             | Synaptic systems         | 135 421    |          | 1:1000 |
| GAPDH               | Santa Cruz               | sc:47724   |          | 1:1000 |
| GFAP                | Millipore                | MAB360     | 1:100    |        |
